# Supplementary material
Source: PubMed Central journal article supplement (PMC5411370)
Supplement: 11357_2017_9971_MOESM1_ESM.pdf [file 11357_2017_9971_MOESM1_ESM.pdf]

**Table 1**

| Group                    | Cox Regression |         | Quantile Analysis |         |              |         |              |         |
|--------------------------|----------------|---------|-------------------|---------|--------------|---------|--------------|---------|
|                          | Coeff          | p value | 30%               | p value | 50%          | p value | 90%          | p value |
| <b>Males</b>             |                |         |                   |         |              |         |              |         |
| WT vs LID <sub>10d</sub> | 0.39           | 0.052   | <b>-85.9</b>      | 0.04    | <b>-82.6</b> | 0.25    | <b>-54.8</b> | 0.15    |
| WT vs LID <sub>5m</sub>  | 0.28           | 0.14    | <b>-50.9</b>      | 0.08    | <b>-23.8</b> | 0.4     | <b>-24.1</b> | 0.71    |
| WT vs LID <sub>15m</sub> | 0.14           | 0.47    | <b>73.1</b>       | 0.007   | <b>15.4</b>  | 0.43    | <b>-36.9</b> | 0.21    |
| <b>Females</b>           |                |         |                   |         |              |         |              |         |
| WT vs LID <sub>10d</sub> | -0.33          | 0.082   | <b>9.2</b>        | 0.71    | <b>131.4</b> | <0.001  | <b>26.5</b>  | 0.013   |
| WT vs LID <sub>5m</sub>  | -0.52          | 0.005   | <b>86.5</b>       | 0.009   | <b>136.1</b> | <0.001  | <b>30</b>    | 0.054   |
| WT vs LID <sub>15m</sub> | -0.37          | 0.043   | <b>13.4</b>       | 0.81    | <b>53.6</b>  | 0.29    | <b>37</b>    | <0.001  |

## **Supplemental Experimental Procedures**

**Pathological assessment:** A list of pathological lesions was compiled for each mouse that included both neoplastic and non-neoplastic diseases, as previously described (Ikeno et al., 2003; Ikeno et al., 2009). Based on these data, tumor burden, disease burden and severity of each lesion were assessed. Tumor burden was calculated as the sum of the different types of tumors in each mouse. For example, a mouse that had lymphoma and hepatocarcinoma had a tumor burden of 2. Disease burden was similarly calculated as the sum of all histopathological changes in a mouse. The percentage of tumor-bearing mice and overall incidence of disease were calculated for each experimental group. All pathological analyses were accomplished using a double blind procedure by two independent pathologists.

**Grading of lesions:** The severity of neoplastic lesions and glomerulonephritis was determined using grading systems previously described (Ikeno et al., 2003; Ikeno et al., 2009). For neoplastic lesions- Grade 1: primary site only; Grade 2: primary site and intra-organ or one other organ metastasis; Grade 3: metastasis to 2-3 organs; and Grade 4: metastasis to more than 4 organs or Grade 3 with additional pathology, e.g., pleural effusion, ascites, and subcutaneous edema. For glomerulonephritis- Grade 0: no lesions; Grade 1: minimal change in glomeruli; Grade 2: Grade 1 with a few (less than 10) casts in renal tubules; Grade 3: Grade 1 with more than 10 casts in renal tubules; and Grade 4: Grade 3 with interstitial fibrosis.

**Balance Beam:** Mice were placed on a 24 inch long, 0.5 inch wide rod, 12 inches above the ground. The average time the animals were able to walk along the balance

beam or maintain the grip on the beam was quantified. Trials ended at 20 seconds. Each animal was given 3 trials.

**Eye Blink Reflex:** The ability of the mice to respond to touch of the eye with a q-tip was measured by 2 blinded experimenters. Mice were given a score of 2 if they blinked and turned their head prior to physical contact. A score of a 1 was achieved if the animals did not respond until the q-tip touched the eye, while a 0 was given if the animals did not respond at all. Each eye was independently tested.

## **SUPPLEMENTAL LEGENDS**

**Supplemental Figure 1: IGF-1 deficiency did not improve healthspan.** The average stride length (cm) of males (A) and females (B) was assessed at 25-27 months of age. The empty bars represent the front right leg, the dashed represent the hind right leg, the darker bar represents the front left leg, and the hatched represents the hind left leg. The asterisk indicates significant difference compared to the respective control mouse stride length for that leg ( $p < 0.05$ , mean  $\pm$  SEM,  $n = 17-51$ ). C) The average time each male mouse was able to maintain balance on a balancing rod. D) The average eye blink reflex in male mice upon touch with a q-tip.

**Supplemental Table 1: Description of cross-sectional cohort.** Average body and organ weights in the male and female control and IGF-1 deficient mice. All weights are represented in mgs (mean  $\pm$  SEM).

**Supplemental Table 2: Description of the cross-sectional pathology.** The total number of animals analyzed for each lesion type, the total number of animals positive for each lesion, and the percent of animals with each lesion are represented.

**Supplemental Table 3: Description of the end-of-life pathology in the lifespan cohort.** The total number of animals analyzed for each lesion type, the total number of animals positive for each lesion, and the percent of animals with each lesion are represented.

# Supplemental Figure 1

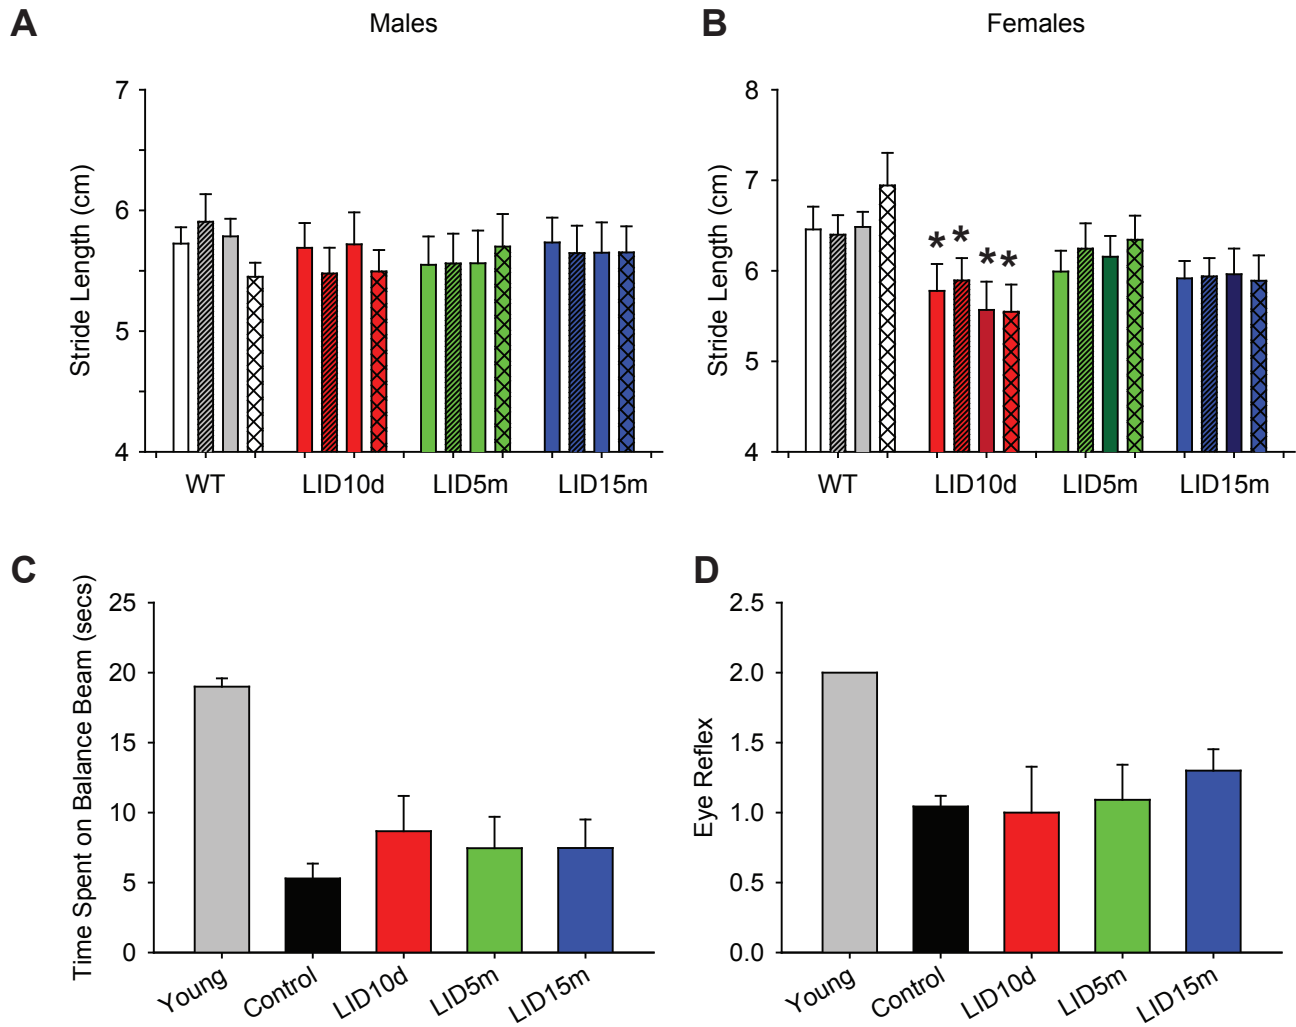

# Supplemental Table 1

| Male               | n  | Whole Body          | Brain         | Hippocampus  | Heart         | Lung           | Spleen         | Liver           | L. Kidney     | R. Kidney     | Quadriceps    |
|--------------------|----|---------------------|---------------|--------------|---------------|----------------|----------------|-----------------|---------------|---------------|---------------|
| Young              | 10 | 2.57E+04 ± 5.68E+02 | 422.25 ± 5.30 | 16.00 ± 0.19 | 120.50 ± 3.62 | 199.20 ± 13.20 | 57.50 ± 1.32   | 1141.70 ± 24.30 | 172.30 ± 4.59 | 170.20 ± 5.34 | 225.28 ± 8.84 |
| Control            | 51 | 2.64E+04 ± 3.39E+02 | 431.17 ± 1.56 | 16.56 ± 0.14 | 164.48 ± 4.13 | 255.96 ± 22.22 | 82.37 ± 14.40  | 1519.64 ± 66.34 | 219.42 ± 4.51 | 227.24 ± 4.53 | 199.39 ± 4.21 |
| LID <sub>10d</sub> | 17 | 2.36E+04 ± 5.90E+02 | 416.95 ± 5.34 | 16.11 ± 0.37 | 150.47 ± 4.86 | 236.65 ± 13.42 | 77.71 ± 9.35   | 1464.59 ± 67.49 | 147.06 ± 8.13 | 161.29 ± 9.23 | 182.91 ± 7.82 |
| LID <sub>5m</sub>  | 15 | 2.40E+04 ± 5.52E+02 | 426.53 ± 3.05 | 16.17 ± 0.23 | 158.93 ± 4.19 | 204.67 ± 8.52  | 104.20 ± 50.56 | 1506.81 ± 87.71 | 155.79 ± 4.46 | 165.68 ± 6.11 | 195.42 ± 5.67 |
| LID <sub>15m</sub> | 19 | 2.46E+04 ± 4.95E+02 | 425.26 ± 2.65 | 16.34 ± 0.22 | 150.84 ± 4.80 | 223.32 ± 7.12  | 172.26 ± 55.78 | 1540.53 ± 65.61 | 168.16 ± 5.66 | 174.84 ± 7.34 | 179.53 ± 5.18 |
| Female             | n  | Whole Body          | Brain         | Hippocampus  | Heart         | Lung           | Spleen         | Liver           | L. Kidney     | R. Kidney     | Quadriceps    |
| Young              | 12 | 2.08E+04 ± 2.14E+02 | 446.50 ± 2.25 | 16.91 ± 0.20 | 110.25 ± 3.45 | 208.09 ± 13.65 | 79.42 ± 2.54   | 834.80 ± 12.73  | 134.83 ± 3.20 | 133.83 ± 1.91 |               |
| Control            | 34 | 2.32E+04 ± 3.74E+02 | 444.11 ± 1.84 | 17.09 ± 0.17 | 146.79 ± 3.81 | 243.59 ± 9.74  | 156.82 ± 31.74 | 1244.53 ± 38.72 | 199.21 ± 4.02 | 208.36 ± 5.90 | 172.05 ± 3.71 |
| LID <sub>10d</sub> | 17 | 1.87E+04 ± 3.50E+02 | 408.72 ± 3.36 | 15.22 ± 0.16 | 127.18 ± 4.90 | 216.13 ± 11.44 | 184.82 ± 67.66 | 1101.24 ± 38.82 | 120.35 ± 4.86 | 130.35 ± 7.80 | 150.56 ± 5.39 |
| LID <sub>5m</sub>  | 18 | 1.93E+04 ± 3.60E+02 | 421.05 ± 1.89 | 16.04 ± 0.13 | 128.50 ± 4.10 | 237.11 ± 11.81 | 79.22 ± 11.98  | 1247.41 ± 64.44 | 131.56 ± 4.04 | 133.61 ± 3.59 | 160.49 ± 4.67 |
| LID <sub>15m</sub> | 17 | 1.89E+04 ± 5.85E+02 | 422.10 ± 4.43 | 16.23 ± 0.23 | 143.94 ± 6.65 | 249.06 ± 23.15 | 154.38 ± 51.20 | 1248.94 ± 39.52 | 147.25 ± 6.32 | 154.81 ± 6.75 | 158.70 ± 4.90 |

# Supplemental Table 2

| Neoplastic Lesions              | Males |    |      |                                |    |       |                               |    |       |                                |    |      | Females |    |      |                                |    |       |                               |    |       |                                |    |       |   |   |
|---------------------------------|-------|----|------|--------------------------------|----|-------|-------------------------------|----|-------|--------------------------------|----|------|---------|----|------|--------------------------------|----|-------|-------------------------------|----|-------|--------------------------------|----|-------|---|---|
|                                 | WT    |    |      | LID <sub>10</sub> <sub>d</sub> |    |       | LID <sub>5</sub> <sub>m</sub> |    |       | LID <sub>15</sub> <sub>m</sub> |    |      | WT      |    |      | LID <sub>10</sub> <sub>d</sub> |    |       | LID <sub>5</sub> <sub>m</sub> |    |       | LID <sub>15</sub> <sub>m</sub> |    |       |   |   |
|                                 | n     | #  | %    | n                              | #  | %     | n                             | #  | %     | n                              | #  | %    | n       | #  | %    | n                              | #  | %     | n                             | #  | %     | n                              | #  | %     | n | # |
| Total                           | 51    | 49 | 96.1 | 17                             | 17 | 100   | 15                            | 15 | 100   | 19                             | 19 | 100  | 34      | 34 | 100  | 17                             | 16 | 94.1  | 18                            | 17 | 94.4  | 16                             | 15 | 93.8  |   |   |
| Lymphoma                        | 51    | 49 | 96.1 | 17                             | 17 | 100   | 15                            | 14 | 93.3  | 19                             | 19 | 100  | 34      | 33 | 97.1 | 17                             | 16 | 94.1  | 18                            | 17 | 94.4  | 16                             | 15 | 93.8  |   |   |
| Hepatocarcinoma                 | 51    | 7  | 13.7 | 17                             | 3  | 17.6  | 15                            | 3  | 20.0  | 19                             | 3  | 15.8 | 34      | 0  | 0    | 17                             | 2  | 11.8  | 18                            | 3  | 16.7* | 16                             | 0  | 0     |   |   |
| Adenoma, Pituitary              |       |    |      |                                |    |       |                               |    |       |                                |    |      | 34      | 10 | 29.4 | 17                             | 1  | 5.9*  | 18                            | 2  | 11.1* | 16                             | 1  | 6.3*  |   |   |
| Hemangiosarcoma                 | 51    | 2  | 3.9  | 17                             | 0  | 0     | 15                            | 0  | 0     | 19                             | 0  | 0    | 34      | 2  | 5.9  | 17                             | 0  | 0.0   | 18                            | 1  | 5.6   | 16                             | 0  | 0     |   |   |
| Adenoma, Alveolar               | 51    | 4  | 7.8  | 17                             | 1  | 5.9   | 15                            | 3  | 20.0  | 19                             | 3  | 15.8 |         |    |      |                                |    |       |                               |    |       |                                |    |       |   |   |
| <b>Non-Neoplastic Lesions</b>   |       |    |      |                                |    |       |                               |    |       |                                |    |      |         |    |      |                                |    |       |                               |    |       |                                |    |       |   |   |
| Glomerular nephritis            | 51    | 39 | 76.5 | 17                             | 5  | 29.4  | 15                            | 8  | 53.3  | 19                             | 8  | 42.1 | 34      | 28 | 82.4 | 17                             | 2  | 11.8* | 18                            | 10 | 55.6* | 16                             | 14 | 87.5  |   |   |
| Testicular Cyst                 | 51    | 46 | 90.2 | 17                             | 14 | 82.4  | 15                            | 14 | 93.3  | 19                             | 15 | 78.9 |         |    |      |                                |    |       |                               |    |       |                                |    |       |   |   |
| Adenoma, Ovarian                |       |    |      |                                |    |       |                               |    |       |                                |    |      | 34      | 7  | 20.6 | 17                             | 2  | 11.8  | 18                            | 1  | 5.6*  | 16                             | 1  | 6.3*  |   |   |
| Hemangioma, Ovarian             |       |    |      |                                |    |       |                               |    |       |                                |    |      | 34      | 3  | 8.8  | 17                             | 1  | 5.9   | 18                            | 1  | 5.6   | 16                             | 2  | 12.5  |   |   |
| Subcapsular Hyperplasia         | 51    | 6  | 11.8 | 17                             | 1  | 5.9   | 15                            | 0  | 0     | 19                             | 0  | 0    | 34      | 29 | 85.3 | 17                             | 7  | 41.2* | 18                            | 11 | 61.1* | 16                             | 12 | 75.0  |   |   |
| <b>Lymphocytic Infiltration</b> |       |    |      |                                |    |       |                               |    |       |                                |    |      |         |    |      |                                |    |       |                               |    |       |                                |    |       |   |   |
| Salivary                        | 51    | 33 | 64.7 | 17                             | 10 | 58.8  | 15                            | 6  | 40*   | 19                             | 13 | 68.4 | 34      | 22 | 64.7 | 17                             | 12 | 70.6  | 18                            | 13 | 72.2  | 16                             | 11 | 62.5  |   |   |
| Kidney                          | 51    | 33 | 64.7 | 17                             | 10 | 58.8  | 15                            | 10 | 66.7  | 19                             | 14 | 73.7 | 34      | 23 | 67.6 | 17                             | 10 | 58.8  | 18                            | 10 | 55.6  | 16                             | 13 | 81.3  |   |   |
| Liver                           | 51    | 26 | 51.0 | 17                             | 8  | 47.1  | 15                            | 7  | 46.7  | 19                             | 10 | 52.6 | 34      | 18 | 52.9 | 17                             | 10 | 58.8  | 18                            | 8  | 44.4  | 16                             | 5  | 31.3* |   |   |
| Lung                            | 51    | 35 | 68.6 | 17                             | 14 | 82.4  | 15                            | 7  | 46.7* | 19                             | 15 | 78.9 | 34      | 31 | 91.2 | 17                             | 16 | 94.1  | 18                            | 15 | 83.3  | 16                             | 13 | 81.3* |   |   |
| Spleen                          | 51    | 42 | 82.4 | 17                             | 14 | 82.4  | 15                            | 12 | 80    | 19                             | 18 | 94.7 | 34      | 31 | 91.2 | 17                             | 16 | 94.1  | 18                            | 17 | 94.4  | 16                             | 13 | 81.3* |   |   |
| Stomach                         | 51    | 2  | 3.9  | 17                             | 0  | 0     | 15                            | 1  | 6.7   | 19                             | 0  | 0    | 34      | 1  | 2.9  | 17                             | 0  | 0     | 18                            | 0  | 0     | 16                             | 1  | 6.3   |   |   |
| Pancreas                        | 51    | 11 | 21.6 | 17                             | 6  | 35.3* | 15                            | 5  | 33.3  | 19                             | 3  | 15.8 | 34      | 17 | 50   | 17                             | 5  | 29.4* | 18                            | 7  | 38.9  | 16                             | 8  | 50    |   |   |
| Intestine                       | 51    | 35 | 68.6 | 17                             | 11 | 64.7  | 15                            | 8  | 53.3  | 19                             | 12 | 63.2 | 34      | 45 | 44.1 | 17                             | 8  | 47.1  | 18                            | 11 | 61.1* | 16                             | 10 | 62.5* |   |   |

# Supplemental Table 3

|                                |  | Male Pathology |     |      |                                |    |      |                               |    |      |                                |    |      | Female Pathology |     |      |                                |    |      |                               |    |      |                                |    |      |   |   |   |   |   |   |
|--------------------------------|--|----------------|-----|------|--------------------------------|----|------|-------------------------------|----|------|--------------------------------|----|------|------------------|-----|------|--------------------------------|----|------|-------------------------------|----|------|--------------------------------|----|------|---|---|---|---|---|---|
|                                |  | WT             |     |      | LID <sub>10</sub> <sub>d</sub> |    |      | LID <sub>5</sub> <sub>m</sub> |    |      | LID <sub>15</sub> <sub>m</sub> |    |      | WT               |     |      | LID <sub>10</sub> <sub>d</sub> |    |      | LID <sub>5</sub> <sub>m</sub> |    |      | LID <sub>15</sub> <sub>m</sub> |    |      |   |   |   |   |   |   |
| Neoplastic Lesions             |  | n              | #   | %    | n                              | #  | %    | n                             | #  | %    | n                              | #  | %    | n                | #   | %    | n                              | #  | %    | n                             | #  | %    | n                              | #  | %    | n | # | % | n | # | % |
| Total                          |  | 113            | 100 | 88.5 | 32                             | 29 | 90.6 | 36                            | 31 | 86.1 | 34                             | 24 | 70.6 | 122              | 107 | 87.7 | 37                             | 33 | 89.2 | 38                            | 35 | 92.1 | 42                             | 37 | 88.1 |   |   |   |   |   |   |
| Fatal                          |  | 113            | 77  | 68.1 | 32                             | 22 | 68.8 | 36                            | 26 | 72.2 | 34                             | 18 | 52.9 | 122              | 93  | 76.2 | 37                             | 25 | 67.6 | 38                            | 28 | 73.7 | 42                             | 29 | 69.0 |   |   |   |   |   |   |
| Lymphoma                       |  |                |     |      |                                |    |      |                               |    |      |                                |    |      |                  |     |      |                                |    |      |                               |    |      |                                |    |      |   |   |   |   |   |   |
| Total                          |  | 113            | 93  | 82.3 | 32                             | 25 | 78.1 | 36                            | 26 | 72.2 | 34                             | 16 | 47.1 | 122              | 107 | 87.7 | 37                             | 29 | 78.4 | 38                            | 29 | 76.3 | 42                             | 35 | 83.3 |   |   |   |   |   |   |
| Fatal                          |  | 113            | 67  | 59.3 | 32                             | 17 | 53.1 | 36                            | 19 | 52.8 | 34                             | 16 | 47.1 | 122              | 85  | 69.7 | 37                             | 23 | 62.2 | 38                            | 26 | 68.4 | 42                             | 26 | 61.9 |   |   |   |   |   |   |
| Hepatocarcinoma                |  |                |     |      |                                |    |      |                               |    |      |                                |    |      |                  |     |      |                                |    |      |                               |    |      |                                |    |      |   |   |   |   |   |   |
| Total                          |  | 113            | 11  | 9.7  | 32                             | 10 | 31.3 | 36                            | 8  | 22.2 | 34                             | 4  | 11.8 | 122              | 5   | 4.1  | 37                             | 5  | 13.5 | 38                            | 13 | 34.2 | 42                             | 5  | 11.9 |   |   |   |   |   |   |
| Fatal                          |  | 113            | 8   | 7.1  | 32                             | 5  | 15.6 | 36                            | 8  | 22.2 | 34                             | 2  | 5.9  | 122              | 2   | 1.6  | 37                             | 3  | 8.1  | 38                            | 5  | 13.2 | 42                             | 2  | 4.8  |   |   |   |   |   |   |
| Hemangiosarcoma                |  |                |     |      |                                |    |      |                               |    |      |                                |    |      |                  |     |      |                                |    |      |                               |    |      |                                |    |      |   |   |   |   |   |   |
| Total                          |  | 113            | 3   | 2.7  | 32                             | 3  | 9.4  | 36                            | 1  | 2.8  | 34                             | 0  | 0.0  | 122              | 0   | 0.0  | 37                             | 0  | 0.0  | 38                            | 1  | 2.6  | 42                             | 1  | 2.4  |   |   |   |   |   |   |
| Fatal                          |  | 113            | 3   | 2.7  | 32                             | 2  | 6.3  | 36                            | 1  | 2.8  | 34                             | 0  | 0.0  | 122              | 0   | 0.0  | 37                             | 0  | 0.0  | 38                            | 1  | 2.6  | 42                             | 0  | 0.0  |   |   |   |   |   |   |
| Adenoma, Pituitary             |  |                |     |      |                                |    |      |                               |    |      |                                |    |      |                  |     |      |                                |    |      |                               |    |      |                                |    |      |   |   |   |   |   |   |
| Total                          |  |                |     |      |                                |    |      |                               |    |      |                                |    |      | 96               | 32  | 33.3 | 28                             | 2  | 7.1  | 27                            | 2  | 7.4  | 30                             | 1  | 3.3  |   |   |   |   |   |   |
| Fatal                          |  |                |     |      |                                |    |      |                               |    |      |                                |    |      | 96               | 15  | 15.6 | 28                             | 0  | 0.0  | 27                            | 0  | 0.0  | 30                             | 0  | 0.0  |   |   |   |   |   |   |
| Non-Neoplastic Lesions         |  |                |     |      |                                |    |      |                               |    |      |                                |    |      |                  |     |      |                                |    |      |                               |    |      |                                |    |      |   |   |   |   |   |   |
| Glomerular nephritis           |  |                |     |      |                                |    |      |                               |    |      |                                |    |      |                  |     |      |                                |    |      |                               |    |      |                                |    |      |   |   |   |   |   |   |
| Total                          |  | 113            | 106 | 93.8 | 32                             | 11 | 34.4 | 36                            | 23 | 63.9 | 34                             | 32 | 94.1 | 121              | 116 | 95.9 | 37                             | 21 | 56.8 | 38                            | 32 | 84.2 | 42                             | 26 | 61.9 |   |   |   |   |   |   |
| Fatal                          |  | 113            | 3   | 2.7  | 32                             | 0  | 0.0  | 36                            | 0  | 0.0  | 34                             | 0  | 0.0  | 121              | 12  | 9.9  | 37                             | 0  | 0.0  | 38                            | 1  | 2.6  | 42                             |    | 0.0  |   |   |   |   |   |   |
| Thrombus, Heart                |  |                |     |      |                                |    |      |                               |    |      |                                |    |      |                  |     |      |                                |    |      |                               |    |      |                                |    |      |   |   |   |   |   |   |
| Total                          |  | 113            | 4   | 3.5  | 32                             | 2  | 6.3  | 36                            | 2  | 5.6  | 34                             | 0  | 0.0  | 121              | 9   | 7.4  | 37                             | 1  | 2.7  | 38                            | 0  | 0.0  | 41                             | 1  | 2.4  |   |   |   |   |   |   |
| Fatal                          |  | 113            | 3   | 2.7  | 32                             | 2  | 6.3  | 36                            | 1  | 2.8  | 34                             | 0  | 0.0  | 121              | 4   | 3.3  | 37                             | 0  | 0.0  | 38                            | 0  | 0.0  | 41                             | 0  | 0.0  |   |   |   |   |   |   |
| Mineralization, Brain          |  |                |     |      |                                |    |      |                               |    |      |                                |    |      |                  |     |      |                                |    |      |                               |    |      |                                |    |      |   |   |   |   |   |   |
| Total                          |  | 112            | 46  | 41.1 | 31                             | 3  | 9.7  | 35                            | 9  | 25.7 | 34                             | 12 | 35.3 | 118              | 11  | 9.3  | 37                             | 4  | 10.8 | 35                            | 11 | 31.4 | 40                             | 4  | 10.0 |   |   |   |   |   |   |
| Testicular Cysts               |  |                |     |      |                                |    |      |                               |    |      |                                |    |      |                  |     |      |                                |    |      |                               |    |      |                                |    |      |   |   |   |   |   |   |
| Total                          |  | 113            | 94  | 83.2 | 32                             | 18 | 56.3 | 36                            | 18 | 50.0 | 34                             | 23 | 67.6 |                  |     |      |                                |    |      |                               |    |      |                                |    |      |   |   |   |   |   |   |
| Sperm granuloma                |  |                |     |      |                                |    |      |                               |    |      |                                |    |      |                  |     |      |                                |    |      |                               |    |      |                                |    |      |   |   |   |   |   |   |
| Total                          |  | 113            | 2   | 1.8  | 32                             | 1  | 3.1  | 36                            | 0  | 0.0  | 34                             | 1  | 2.9  |                  |     |      |                                |    |      |                               |    |      |                                |    |      |   |   |   |   |   |   |
| Adenoma, Ovarian               |  |                |     |      |                                |    |      |                               |    |      |                                |    |      |                  |     |      |                                |    |      |                               |    |      |                                |    |      |   |   |   |   |   |   |
| Total                          |  |                |     |      |                                |    |      |                               |    |      |                                |    |      | 121              | 2   | 1.7  | 37                             | 4  | 10.8 | 38                            | 2  | 5.3  | 41                             | 3  | 7.3  |   |   |   |   |   |   |
| Hemangioma, Ovarian            |  |                |     |      |                                |    |      |                               |    |      |                                |    |      |                  |     |      |                                |    |      |                               |    |      |                                |    |      |   |   |   |   |   |   |
| Total                          |  |                |     |      |                                |    |      |                               |    |      |                                |    |      | 121              | 13  | 10.7 | 37                             | 4  | 10.8 | 38                            | 4  | 10.5 | 41                             | 4  | 9.8  |   |   |   |   |   |   |
| Subcapsular Hyperplasia        |  |                |     |      |                                |    |      |                               |    |      |                                |    |      |                  |     |      |                                |    |      |                               |    |      |                                |    |      |   |   |   |   |   |   |
| Total                          |  | 113            | 11  | 9.7  | 32                             | 0  | 0.0  | 36                            | 0  | 0.0  | 34                             | 0  | 0.0  | 108              | 85  | 78.7 | 34                             | 13 | 38.2 | 36                            | 13 | 36.1 | 39                             | 21 | 53.8 |   |   |   |   |   |   |
| Papillary Hyperplasia, Thyroid |  |                |     |      |                                |    |      |                               |    |      |                                |    |      |                  |     |      |                                |    |      |                               |    |      |                                |    |      |   |   |   |   |   |   |
| Total                          |  | 34             | 6   | 17.6 | 8                              | 4  | 50.0 | 13                            | 4  | 30.8 | 9                              | 1  | 11.1 | 26               | 1   | 3.8  | 10                             | 0  | 0.0  | 10                            | 2  | 20.0 | 14                             | 3  | 21.4 |   |   |   |   |   |   |
| Lymphocytic Infiltration       |  |                |     |      |                                |    |      |                               |    |      |                                |    |      |                  |     |      |                                |    |      |                               |    |      |                                |    |      |   |   |   |   |   |   |
| Kidney                         |  | 113            | 36  | 31.9 | 32                             | 9  | 28.1 | 36                            | 7  | 19.4 | 34                             | 13 | 38.2 | 121              | 61  | 50.4 | 37                             | 14 | 37.8 | 38                            | 18 | 47.4 | 42                             | 21 | 50.0 |   |   |   |   |   |   |
| Liver                          |  | 113            | 55  | 48.7 | 32                             | 15 | 46.9 | 36                            | 19 | 52.8 | 34                             | 13 | 38.2 | 122              | 69  | 56.6 | 37                             | 18 | 48.6 | 38                            | 16 | 42.1 | 42                             | 21 | 50.0 |   |   |   |   |   |   |
| Lung                           |  | 112            | 47  | 42.0 | 31                             | 12 | 38.7 | 35                            | 15 | 42.9 | 34                             | 13 | 38.2 | 118              | 71  | 60.2 | 37                             | 23 | 62.2 | 38                            | 21 | 55.3 | 41                             | 21 | 51.2 |   |   |   |   |   |   |
| Urinary                        |  | 102            | 3   | 2.9  | 30                             | 4  | 13.3 | 29                            | 1  | 3.4  | 31                             | 3  | 9.7  | 83               | 24  | 28.9 | 34                             | 3  | 8.8  | 35                            | 5  | 14.3 | 31                             | 6  | 19.4 |   |   |   |   |   |   |
| Stomach                        |  | 113            | 0   | 0.0  | 32                             | 0  | 0.0  | 36                            | 0  | 0.0  | 33                             | 0  | 0.0  | 110              | 6   | 5.5  | 37                             | 1  | 2.7  | 38                            | 1  | 2.6  | 42                             | 2  | 4.8  |   |   |   |   |   |   |
| Intestine                      |  | 105            | 21  | 20.0 | 32                             | 4  | 12.5 | 32                            | 3  | 9.4  | 34                             | 3  | 8.8  | 109              | 28  | 25.7 | 37                             | 5  | 13.5 | 38                            | 4  | 10.5 | 43                             | 4  | 9.3  |   |   |   |   |   |   |
